# Supplementary material
Source: publisher figshare collection journal article supplement (https://acs.figshare.com/ndownloader/files/5734704)
Supplement: Supplementary file 1 [file 5734704]

data_a1 
 
_audit_creation_method            SHELXL 
_chemical_name_systematic 
; 
 ? 
; 
_chemical_name_common             ? 
_chemical_formula_moiety          ? 
_chemical_formula_structural      ? 
_chemical_formula_analytical      ? 
_chemical_formula_sum             'C20 H16 Br1.30 Cl0.60 I1.10 S16' 
_chemical_formula_weight          1034.03 
_chemical_melting_point           ? 
_chemical_compound_source         ? 
 
loop_ 
 _atom_type_symbol 
 _atom_type_description 
 _atom_type_scat_dispersion_real 
 _atom_type_scat_dispersion_imag 
 _atom_type_scat_source 
 'C'  'C'   0.0033   0.0016 
 'International Tables Vol C Tables 4.2.6.8 and 6.1.1.4' 
 'H'  'H'   0.0000   0.0000 
 'International Tables Vol C Tables 4.2.6.8 and 6.1.1.4' 
 'S'  'S'   0.1246   0.1234 
 'International Tables Vol C Tables 4.2.6.8 and 6.1.1.4' 
 'Cl'  'Cl'   0.1484   0.1585 
 'International Tables Vol C Tables 4.2.6.8 and 6.1.1.4' 
 'Br'  'Br'  -0.2901   2.4595 
 'International Tables Vol C Tables 4.2.6.8 and 6.1.1.4' 
 'I'  'I'  -0.4742   1.8119 
 'International Tables Vol C Tables 4.2.6.8 and 6.1.1.4' 
 
_symmetry_cell_setting            triclinic 
_symmetry_space_group_name_H-M    P-1 
 
loop_ 
 _symmetry_equiv_pos_as_xyz 
 'x, y, z' 
 '-x, -y, -z' 
 
_cell_length_a                    12.027(1) 
_cell_length_b                    8.872(1) 
_cell_length_c                    16.347(2) 
_cell_angle_alpha                 88.582(6) 
_cell_angle_beta                  85.189(8) 
_cell_angle_gamma                 70.862(7) 
_cell_volume                      1642.1(3) 
_cell_formula_units_Z             2 
_cell_measurement_temperature     293(2) 
_cell_measurement_reflns_used     6066 
_cell_measurement_theta_min       1.0 
_cell_measurement_theta_max       20.0
 
_exptl_crystal_description        plate 
_exptl_crystal_colour             black 
_exptl_crystal_size_max           0.3 
_exptl_crystal_size_mid           0.2 
_exptl_crystal_size_min           0.02 
_exptl_crystal_density_meas       ? 
_exptl_crystal_density_diffrn     2.091 
_exptl_crystal_density_method     ? 
_exptl_crystal_F_000              1012 
_exptl_absorpt_coefficient_mu     3.735 
_exptl_absorpt_correction_type    none 
_exptl_absorpt_correction_T_min   ? 
_exptl_absorpt_correction_T_max   ? 
 
_exptl_special_details 
; 
 ? 
; 
 
_diffrn_ambient_temperature       295(2) 
_diffrn_radiation_wavelength      0.71073 
_diffrn_radiation_type            MoK\a 
_diffrn_radiation_source          'fine-focus sealed tube' 
_diffrn_radiation_monochromator   graphite 
_diffrn_measurement_device        'Kappa CCD' 
_diffrn_measurement_method        phi-scan 
_diffrn_standards_number          ? 
_diffrn_standards_interval_count  ? 
_diffrn_standards_interval_time   ? 
_diffrn_standards_decay_%         0 
_diffrn_reflns_number             5144 
_diffrn_reflns_av_R_equivalents   0.0417 
_diffrn_reflns_av_sigmaI/netI     0.0596 
_diffrn_reflns_limit_h_min        -11 
_diffrn_reflns_limit_h_max        10 
_diffrn_reflns_limit_k_min        -8 
_diffrn_reflns_limit_k_max        0 
_diffrn_reflns_limit_l_min        -15 
_diffrn_reflns_limit_l_max        15 
_diffrn_reflns_theta_min          1.25 
_diffrn_reflns_theta_max          19.96 
_reflns_number_total              2923 
_reflns_number_observed           2097 
_reflns_observed_criterion        >2sigma(I) 
 
_computing_data_collection        'Kappa CCD' 
_computing_cell_refinement        ? 
_computing_data_reduction         'Denzo and Scalepack' 
_computing_structure_solution     'SHELXS-86 (Sheldrick, 1990)' 
_computing_structure_refinement   'SHELXL-93 (Sheldrick, 1993)' 
_computing_molecular_graphics     ? 
_computing_publication_material   ? 
 
_refine_special_details 
; 
 occupation disorder Cl : Br : I of 0.3 : 0.65 : 0.05 of the anion at
 the general position with Cl2=Br2=I2 and Cl3=Br3=I3 
; 
 
_refine_ls_structure_factor_coef  Fsqd  
_refine_ls_matrix_type            full 
_refine_ls_weighting_scheme 
 'calc w=1/[\s^2^(Fo^2^)+(0.0750P)^2^+0.0000P] where P=(Fo^2^+2Fc^2^)/3' 
_atom_sites_solution_primary      direct 
_atom_sites_solution_secondary    difmap 
_atom_sites_solution_hydrogens    geom 
_refine_ls_hydrogen_treatment     riding 
_refine_ls_extinction_method      SHELXL 
_refine_ls_extinction_coef        0.0018(5) 
_refine_ls_extinction_expression 
 'Fc^*^=kFc[1+0.001xFc^2^\l^3^/sin(2\q)]^-1/4^' 
_refine_ls_number_reflns          2721 
_refine_ls_number_parameters      353 
_refine_ls_number_restraints      0 
_refine_ls_R_factor_all           0.0724 
_refine_ls_R_factor_obs           0.0485 
_refine_ls_wR_factor_all          0.1560 
_refine_ls_wR_factor_obs          0.1280 
_refine_ls_goodness_of_fit_all    1.118 
_refine_ls_goodness_of_fit_obs    1.219 
_refine_ls_restrained_S_all       1.230 
_refine_ls_restrained_S_obs       1.219 
_refine_ls_shift/esd_max          -0.001 
_refine_ls_shift/esd_mean         0.000 
 
loop_ 
 _atom_site_label 
 _atom_site_type_symbol 
 _atom_site_fract_x 
 _atom_site_fract_y 
 _atom_site_fract_z 
 _atom_site_U_iso_or_equiv 
 _atom_site_thermal_displace_type 
 _atom_site_occupancy 
 _atom_site_calc_flag 
 _atom_site_refinement_flags 
 _atom_site_disorder_group 
I1 I 0.24750(7) 0.74016(10) -0.00266(4) 0.0518(4) Uani 1 d . . 
Cl2 Cl 0.16118(14) 1.0588(2) -0.00463(9) 0.0672(6) Uani 0.30 d P . 
Br2 Br 0.16118(14) 1.0588(2) -0.00463(9) 0.0672(6) Uani 0.65 d P . 
I2 I 0.16118(14) 1.0588(2) -0.00463(9) 0.0672(6) Uani 0.05 d P . 
Cl3 Cl 0.3340(2) 0.4225(2) -0.00190(10) 0.0826(6) Uani 0.30 d P . 
Br3 Br 0.3340(2) 0.4225(2) -0.00190(10) 0.0826(6) Uani 0.65 d P . 
I3 I 0.3340(2) 0.4225(2) -0.00190(10) 0.0826(6) Uani 0.05 d P . 
S1 S 0.1155(2) 0.2563(4) 0.3469(2) 0.0454(8) Uani 1 d . . 
S2 S -0.1226(2) 0.4766(3) 0.3927(2) 0.0446(8) Uani 1 d . . 
S3 S 0.1253(3) 0.3614(4) 0.1749(2) 0.0514(9) Uani 1 d . . 
S4 S -0.1604(3) 0.6176(4) 0.2287(2) 0.0563(10) Uani 1 d . . 
S5 S 0.1242(3) 0.0955(4) 0.5252(2) 0.0491(9) Uani 1 d . . 
S6 S -0.1098(2) 0.3222(3) 0.5755(2) 0.0424(8) Uani 1 d . . 
S7 S 0.1593(3) -0.0728(4) 0.6820(2) 0.0545(9) Uani 1 d . . 
S8 S -0.1184(3) 0.2031(4) 0.7451(2) 0.0533(9) Uani 1 d . . 
S9 S 0.3780(2) 0.2753(4) 0.4495(2) 0.0448(8) Uani 1 d . . 
S10 S 0.6134(2) 0.3025(4) 0.4586(2) 0.0445(8) Uani 1 d . . 
S11 S 0.3405(3) 0.4183(4) 0.2861(2) 0.0521(9) Uani 1 d . . 
S12 S 0.6199(3) 0.4572(4) 0.2973(2) 0.0566(9) Uani 1 d . . 
S13 S 0.3944(2) 0.1151(4) 0.6318(2) 0.0425(8) Uani 1 d . . 
S14 S 0.6332(2) 0.1337(4) 0.6343(2) 0.0445(8) Uani 1 d . . 
S15 S 0.3757(2) 0.0156(4) 0.8053(2) 0.0504(9) Uani 1 d . . 
S16 S 0.6641(2) 0.0297(4) 0.8053(2) 0.0496(9) Uani 1 d . . 
C1 C 0.0011(8) 0.3236(12) 0.4226(6) 0.034(3) Uani 1 d . . 
C2 C 0.0458(9) 0.3841(13) 0.2697(6) 0.036(3) Uani 1 d . . 
C3 C -0.0645(9) 0.4823(13) 0.2905(6) 0.037(3) Uani 1 d . . 
C4 C 0.0209(13) 0.4860(27) 0.1132(8) 0.145(9) Uani 1 d . . 
H4A H 0.0578 0.5609 0.0894 0.174 Uiso 1 calc . . 
H4B H 0.0180 0.4185 0.0682 0.174 Uiso 1 calc . . 
C5 C -0.0862(16) 0.5698(23) 0.1316(8) 0.134(8) Uani 1 d . . 
H5A H -0.1325 0.5198 0.1031 0.161 Uiso 1 calc . . 
H5B H -0.0960 0.6715 0.1048 0.161 Uiso 1 calc . . 
C6 C 0.0033(9) 0.2562(12) 0.4986(6) 0.034(3) Uani 1 d . . 
C7 C 0.0684(9) 0.0797(13) 0.6260(6) 0.038(3) Uani 1 d . . 
C8 C -0.0392(8) 0.1845(12) 0.6497(6) 0.032(3) Uani 1 d . . 
C9 C 0.0927(10) -0.0236(15) 0.7841(7) 0.059(4) Uani 1 d . . 
H9A H 0.1247 -0.1155 0.8187 0.071 Uiso 1 calc . . 
H9B H 0.1167 0.0623 0.8039 0.071 Uiso 1 calc . . 
C10 C -0.0401(10) 0.0262(14) 0.7956(7) 0.057(4) Uani 1 d . . 
H10A H -0.0635 0.0398 0.8540 0.068 Uiso 1 calc . . 
H10B H -0.0643 -0.0602 0.7767 0.068 Uiso 1 calc . . 
C11 C 0.4994(9) 0.2428(12) 0.5055(6) 0.035(3) Uani 1 d . . 
C12 C 0.4346(9) 0.3628(12) 0.3655(6) 0.038(3) Uani 1 d . . 
C13 C 0.5424(9) 0.3751(12) 0.3700(6) 0.041(3) Uani 1 d . . 
C14 C 0.4170(12) 0.5131(16) 0.2137(7) 0.067(4) Uani 1 d . . 
H14A H 0.3908 0.5070 0.1597 0.080 Uiso 1 calc . . 
H14B H 0.3946 0.6250 0.2281 0.080 Uiso 1 calc . . 
C15 C 0.5476(12) 0.4440(17) 0.2089(8) 0.074(4) Uani 1 d . . 
H15A H 0.5790 0.4956 0.1640 0.089 Uiso 1 calc . . 
H15B H 0.5690 0.3320 0.1945 0.089 Uiso 1 calc . . 
C16 C 0.5055(8) 0.1758(11) 0.5817(6) 0.030(3) Uani 1 d . . 
C17 C 0.4603(9) 0.0672(11) 0.7255(6) 0.033(3) Uani 1 d . . 
C18 C 0.5720(9) 0.0727(12) 0.7259(6) 0.036(3) Uani 1 d . . 
C19 C 0.4656(11) -0.0033(19) 0.8866(8) 0.080(5) Uani 1 d . . 
H19A H 0.4466 0.1022 0.9103 0.096 Uiso 1 calc . . 
H19B H 0.4409 -0.0683 0.9281 0.096 Uiso 1 calc . . 
C20 C 0.5891(11) -0.0659(19) 0.8751(7) 0.081(5) Uani 1 d . . 
H20A H 0.6097 -0.1759 0.8574 0.098 Uiso 1 calc . . 
H20B H 0.6200 -0.0675 0.9281 0.098 Uiso 1 calc . . 
 
loop_ 
 _atom_site_aniso_label 
 _atom_site_aniso_U_11 
 _atom_site_aniso_U_22 
 _atom_site_aniso_U_33 
 _atom_site_aniso_U_23 
 _atom_site_aniso_U_13 
 _atom_site_aniso_U_12 
I1 0.0591(6) 0.0600(7) 0.0372(6) 0.0020(4) 0.0009(4) -0.0219(4) 
Cl2 0.0829(12) 0.0681(12) 0.0531(10) 0.0014(9) -0.0019(9) -0.0289(10) 
Br2 0.0829(12) 0.0681(12) 0.0531(10) 0.0014(9) -0.0019(9) -0.0289(10) 
I2 0.0829(12) 0.0681(12) 0.0531(10) 0.0014(9) -0.0019(9) -0.0289(10) 
Cl3 0.117(2) 0.0591(12) 0.0614(12) 0.0101(9) 0.0004(11) -0.0175(11) 
Br3 0.117(2) 0.0591(12) 0.0614(12) 0.0101(9) 0.0004(11) -0.0175(11) 
I3 0.117(2) 0.0591(12) 0.0614(12) 0.0101(9) 0.0004(11) -0.0175(11) 
S1 0.045(2) 0.050(2) 0.031(2) 0.0106(15) -0.0042(14) -0.002(2) 
S2 0.043(2) 0.045(2) 0.037(2) 0.0092(15) 0.0016(14) -0.0038(15) 
S3 0.047(2) 0.062(2) 0.031(2) 0.009(2) 0.0027(14) 0.000(2) 
S4 0.046(2) 0.056(2) 0.052(2) 0.026(2) 0.000(2) -0.001(2) 
S5 0.046(2) 0.058(2) 0.030(2) 0.009(2) 0.0039(14) -0.002(2) 
S6 0.040(2) 0.046(2) 0.033(2) 0.0099(14) 0.0015(14) -0.0046(14) 
S7 0.055(2) 0.052(2) 0.037(2) 0.010(2) 0.003(2) 0.007(2) 
S8 0.049(2) 0.059(2) 0.042(2) 0.014(2) 0.008(2) -0.008(2) 
S9 0.043(2) 0.057(2) 0.035(2) 0.014(2) -0.0039(15) -0.019(2) 
S10 0.038(2) 0.057(2) 0.038(2) 0.012(2) -0.0039(14) -0.016(2) 
S11 0.053(2) 0.069(2) 0.037(2) 0.021(2) -0.014(2) -0.023(2) 
S12 0.057(2) 0.071(2) 0.046(2) 0.028(2) -0.006(2) -0.028(2) 
S13 0.043(2) 0.053(2) 0.033(2) 0.0094(15) -0.0030(14) -0.017(2) 
S14 0.041(2) 0.057(2) 0.034(2) 0.011(2) 0.0005(14) -0.016(2) 
S15 0.038(2) 0.070(2) 0.044(2) 0.026(2) -0.009(2) -0.019(2) 
S16 0.042(2) 0.064(2) 0.044(2) 0.021(2) -0.010(2) -0.020(2) 
C1 0.033(7) 0.034(7) 0.036(7) -0.004(6) 0.003(5) -0.012(5) 
C2 0.043(7) 0.040(7) 0.023(6) 0.009(5) 0.006(5) -0.015(6) 
C3 0.044(8) 0.044(7) 0.026(6) 0.012(5) -0.007(5) -0.017(6) 
C4 0.065(11) 0.257(24) 0.029(9) 0.047(12) -0.009(8) 0.059(13) 
C5 0.121(16) 0.166(18) 0.032(9) 0.019(10) -0.012(9) 0.068(13) 
C6 0.043(7) 0.038(7) 0.020(6) 0.007(5) 0.005(5) -0.015(6) 
C7 0.028(7) 0.055(8) 0.029(6) 0.003(6) 0.001(5) -0.013(6) 
C8 0.023(7) 0.043(7) 0.032(6) 0.006(5) -0.002(5) -0.012(6) 
C9 0.060(9) 0.080(10) 0.030(7) 0.014(7) 0.003(6) -0.015(7) 
C10 0.055(9) 0.062(9) 0.042(7) 0.017(7) 0.009(7) -0.010(7) 
C11 0.041(7) 0.033(7) 0.030(7) 0.002(5) -0.007(5) -0.009(5) 
C12 0.042(7) 0.036(7) 0.028(7) 0.008(5) -0.006(6) -0.003(6) 
C13 0.043(8) 0.035(7) 0.041(7) 0.014(6) -0.002(6) -0.008(6) 
C14 0.089(11) 0.078(10) 0.040(8) 0.025(7) -0.023(7) -0.034(9) 
C15 0.074(11) 0.088(11) 0.052(9) 0.011(8) -0.008(8) -0.013(9) 
C16 0.035(7) 0.030(6) 0.025(6) 0.001(5) 0.002(5) -0.011(5) 
C17 0.029(7) 0.029(6) 0.034(7) 0.009(5) 0.005(5) -0.001(5) 
C18 0.040(7) 0.030(7) 0.034(7) 0.009(5) 0.009(6) -0.008(5) 
C19 0.047(9) 0.146(15) 0.050(9) 0.028(9) -0.010(7) -0.036(9) 
C20 0.056(10) 0.149(15) 0.041(8) 0.050(9) -0.016(7) -0.037(9) 
 
_geom_special_details 
; 
 All esds (except the esd in the dihedral angle between two l.s. planes) 
 are estimated using the full covariance matrix.  The cell esds are taken 
 into account individually in the estimation of esds in distances, angles 
 and torsion angles; correlations between esds in cell parameters are only 
 used when they are defined by crystal symmetry.  An approximate (isotropic) 
 treatment of cell esds is used for estimating esds involving l.s. planes. 
; 
 
loop_ 
 _geom_bond_atom_site_label_1 
 _geom_bond_atom_site_label_2 
 _geom_bond_distance 
 _geom_bond_site_symmetry_2 
 _geom_bond_publ_flag 
I1 I3 2.665(2) . ? 
I1 Br3 2.665(2) . ? 
I1 Cl3 2.665(2) . ? 
I1 Cl2 2.673(2) . ? 
I1 I2 2.673(2) . ? 
I1 Br2 2.673(2) . ? 
S1 C1 1.731(10) . ? 
S1 C2 1.749(11) . ? 
S2 C1 1.749(11) . ? 
S2 C3 1.763(10) . ? 
S3 C2 1.731(10) . ? 
S3 C4 1.750(14) . ? 
S4 C3 1.737(11) . ? 
S4 C5 1.744(14) . ? 
S5 C6 1.746(11) . ? 
S5 C7 1.747(10) . ? 
S6 C6 1.733(10) . ? 
S6 C8 1.762(10) . ? 
S7 C7 1.732(11) . ? 
S7 C9 1.788(11) . ? 
S8 C8 1.738(10) . ? 
S8 C10 1.769(12) . ? 
S9 C11 1.729(10) . ? 
S9 C12 1.756(10) . ? 
S10 C11 1.740(10) . ? 
S10 C13 1.745(11) . ? 
S11 C12 1.749(11) . ? 
S11 C14 1.797(11) . ? 
S12 C13 1.740(10) . ? 
S12 C15 1.773(13) . ? 
S13 C16 1.735(9) . ? 
S13 C17 1.761(10) . ? 
S14 C16 1.751(10) . ? 
S14 C18 1.764(9) . ? 
S15 C17 1.732(9) . ? 
S15 C19 1.754(13) . ? 
S16 C18 1.731(11) . ? 
S16 C20 1.764(12) . ? 
C1 C6 1.364(14) . ? 
C2 C3 1.347(14) . ? 
C4 C5 1.27(2) . ? 
C7 C8 1.355(14) . ? 
C9 C10 1.51(2) . ? 
C11 C16 1.365(14) . ? 
C12 C13 1.345(13) . ? 
C14 C15 1.48(2) . ? 
C17 C18 1.361(13) . ? 
C19 C20 1.40(2) . ? 
 
loop_ 
 _geom_angle_atom_site_label_1 
 _geom_angle_atom_site_label_2 
 _geom_angle_atom_site_label_3 
 _geom_angle 
 _geom_angle_site_symmetry_1 
 _geom_angle_site_symmetry_3 
 _geom_angle_publ_flag 
I3 I1 Br3 0.00(11) . . ? 
I3 I1 Cl3 0.00(11) . . ? 
Br3 I1 Cl3 0.00(11) . . ? 
I3 I1 Cl2 179.57(5) . . ? 
Br3 I1 Cl2 179.57(5) . . ? 
Cl3 I1 Cl2 179.57(5) . . ? 
I3 I1 I2 179.57(5) . . ? 
Br3 I1 I2 179.57(5) . . ? 
Cl3 I1 I2 179.57(5) . . ? 
Cl2 I1 I2 0.00(9) . . ? 
I3 I1 Br2 179.57(5) . . ? 
Br3 I1 Br2 179.57(5) . . ? 
Cl3 I1 Br2 179.57(5) . . ? 
Cl2 I1 Br2 0.00(9) . . ? 
I2 I1 Br2 0.00(9) . . ? 
C1 S1 C2 96.3(5) . . ? 
C1 S2 C3 94.7(5) . . ? 
C2 S3 C4 101.7(6) . . ? 
C3 S4 C5 101.7(6) . . ? 
C6 S5 C7 95.7(5) . . ? 
C6 S6 C8 95.5(5) . . ? 
C7 S7 C9 101.5(5) . . ? 
C8 S8 C10 102.7(5) . . ? 
C11 S9 C12 95.1(5) . . ? 
C11 S10 C13 95.3(5) . . ? 
C12 S11 C14 103.2(6) . . ? 
C13 S12 C15 99.9(6) . . ? 
C16 S13 C17 96.1(5) . . ? 
C16 S14 C18 95.4(5) . . ? 
C17 S15 C19 101.2(5) . . ? 
C18 S16 C20 100.9(5) . . ? 
C6 C1 S1 122.8(8) . . ? 
C6 C1 S2 122.0(8) . . ? 
S1 C1 S2 115.1(6) . . ? 
C3 C2 S3 128.2(8) . . ? 
C3 C2 S1 116.2(8) . . ? 
S3 C2 S1 115.5(6) . . ? 
C2 C3 S4 128.3(8) . . ? 
C2 C3 S2 117.7(8) . . ? 
S4 C3 S2 114.0(6) . . ? 
C5 C4 S3 129.9(11) . . ? 
C4 C5 S4 128.6(12) . . ? 
C1 C6 S6 123.6(8) . . ? 
C1 C6 S5 121.3(8) . . ? 
S6 C6 S5 115.2(6) . . ? 
C8 C7 S7 128.6(8) . . ? 
C8 C7 S5 116.8(8) . . ? 
S7 C7 S5 114.5(6) . . ? 
C7 C8 S8 128.5(8) . . ? 
C7 C8 S6 116.8(8) . . ? 
S8 C8 S6 114.7(6) . . ? 
C10 C9 S7 117.1(8) . . ? 
C9 C10 S8 116.2(8) . . ? 
C16 C11 S9 122.4(8) . . ? 
C16 C11 S10 122.0(8) . . ? 
S9 C11 S10 115.6(6) . . ? 
C13 C12 S11 129.3(8) . . ? 
C13 C12 S9 117.1(8) . . ? 
S11 C12 S9 113.6(6) . . ? 
C12 C13 S12 127.3(9) . . ? 
C12 C13 S10 117.0(8) . . ? 
S12 C13 S10 115.7(6) . . ? 
C15 C14 S11 114.9(9) . . ? 
C14 C15 S12 117.9(9) . . ? 
C11 C16 S13 124.1(8) . . ? 
C11 C16 S14 121.2(8) . . ? 
S13 C16 S14 114.6(6) . . ? 
C18 C17 S15 128.0(8) . . ? 
C18 C17 S13 116.1(7) . . ? 
S15 C17 S13 116.0(6) . . ? 
C17 C18 S16 128.8(7) . . ? 
C17 C18 S14 116.9(8) . . ? 
S16 C18 S14 114.3(6) . . ? 
C20 C19 S15 121.9(10) . . ? 
C19 C20 S16 118.7(11) . . ? 
 
_refine_diff_density_max    0.563 
_refine_diff_density_min   -1.108 
_refine_diff_density_rms    0.116 

"#===END"


 
data_a3 
 
_audit_creation_method            SHELXL 
_chemical_name_systematic 
; 
 ? 
; 
_chemical_name_common             ? 
_chemical_formula_moiety          ? 
_chemical_formula_structural      ? 
_chemical_formula_analytical      ? 
_chemical_formula_sum             'C20 H16 Br1.30 Cl0.60 I1.10 S16' 
_chemical_formula_weight          1034.03 
_chemical_melting_point           ? 
_chemical_compound_source         ? 
 
loop_ 
 _atom_type_symbol 
 _atom_type_description 
 _atom_type_scat_dispersion_real 
 _atom_type_scat_dispersion_imag 
 _atom_type_scat_source 
 'C'  'C'   0.0033   0.0016 
 'International Tables Vol C Tables 4.2.6.8 and 6.1.1.4' 
 'H'  'H'   0.0000   0.0000 
 'International Tables Vol C Tables 4.2.6.8 and 6.1.1.4' 
 'S'  'S'   0.1246   0.1234 
 'International Tables Vol C Tables 4.2.6.8 and 6.1.1.4' 
 'Cl'  'Cl'   0.1484   0.1585 
 'International Tables Vol C Tables 4.2.6.8 and 6.1.1.4' 
 'Br'  'Br'  -0.2901   2.4595 
 'International Tables Vol C Tables 4.2.6.8 and 6.1.1.4' 
 'I'  'I'  -0.4742   1.8119 
 'International Tables Vol C Tables 4.2.6.8 and 6.1.1.4' 
 
_symmetry_cell_setting            triclinic 
_symmetry_space_group_name_H-M    P-1 
 
loop_ 
 _symmetry_equiv_pos_as_xyz 
 'x, y, z' 
 '-x, -y, -z' 
 
_cell_length_a                    17.251(3) 
_cell_length_b                    9.020(2) 
_cell_length_c                    16.353(3) 
_cell_angle_alpha                 87.967(8) 
_cell_angle_beta                  84.28(1) 
_cell_angle_gamma                 81.38(1) 
_cell_volume                      2502.8(8) 
_cell_formula_units_Z             3 
_cell_measurement_temperature     383(2) 
_cell_measurement_reflns_used     9628 
_cell_measurement_theta_min       1.0 
_cell_measurement_theta_max       20.0 
 
_exptl_crystal_description        plate 
_exptl_crystal_colour             black 
_exptl_crystal_size_max           0.3 
_exptl_crystal_size_mid           0.2 
_exptl_crystal_size_min           0.02 
_exptl_crystal_density_meas       ? 
_exptl_crystal_density_diffrn     2.058 
_exptl_crystal_density_method     ? 
_exptl_crystal_F_000              1518 
_exptl_absorpt_coefficient_mu     3.675 
_exptl_absorpt_correction_type    none 
_exptl_absorpt_correction_T_min   ? 
_exptl_absorpt_correction_T_max   ? 
 
_exptl_special_details 
; 
 ? 
; 
 
_diffrn_ambient_temperature       386(2) 
_diffrn_radiation_wavelength      0.71073 
_diffrn_radiation_type            MoK\a 
_diffrn_radiation_source          'fine-focus sealed tube' 
_diffrn_radiation_monochromator   graphite 
_diffrn_measurement_device        'Kappa CCD' 
_diffrn_measurement_method        phi-scan 
_diffrn_standards_number          ? 
_diffrn_standards_interval_count  ? 
_diffrn_standards_interval_time   ? 
_diffrn_standards_decay_%         0 
_diffrn_reflns_number             7707 
_diffrn_reflns_av_R_equivalents   0.0572 
_diffrn_reflns_av_sigmaI/netI     0.0846 
_diffrn_reflns_limit_h_min        -16 
_diffrn_reflns_limit_h_max        16 
_diffrn_reflns_limit_k_min        0 
_diffrn_reflns_limit_k_max        8 
_diffrn_reflns_limit_l_min        -15 
_diffrn_reflns_limit_l_max        15 
_diffrn_reflns_theta_min          1.20 
_diffrn_reflns_theta_max          19.88 
_reflns_number_total              4389 
_reflns_number_observed           2531 
_reflns_observed_criterion        >2sigma(I) 
 
_computing_data_collection        'KAPPA CCD' 
_computing_cell_refinement        ? 
_computing_data_reduction         'Denzo and Scalepack' 
_computing_structure_solution     'SHELXS-86 (Sheldrick, 1990)' 
_computing_structure_refinement   'SHELXL-93 (Sheldrick, 1993)' 
_computing_molecular_graphics     ? 
_computing_publication_material   ? 
 
_refine_special_details 
; 
 occupation disorder Cl : Br : I of 0.3 : 0.65 : 0.05 of the anion at
 the general position with Cl2=Br2=I2 and Cl3=Br3=I3 and also of the
 centrosymmetric anion with Cl4=Br4=I4
; 
 
_refine_ls_structure_factor_coef  Fsqd  
_refine_ls_matrix_type            full 
_refine_ls_weighting_scheme 
 'calc w=1/[\s^2^(Fo^2^)+(0.0802P)^2^+0.0000P] where P=(Fo^2^+2Fc^2^)/3' 
_atom_sites_solution_primary      direct 
_atom_sites_solution_secondary    difmap 
_atom_sites_solution_hydrogens    geom 
_refine_ls_hydrogen_treatment     riding 
_refine_ls_extinction_method      SHELXL 
_refine_ls_extinction_coef        0.0011(3) 
_refine_ls_extinction_expression 
 'Fc^*^=kFc[1+0.001xFc^2^\l^3^/sin(2\q)]^-1/4^' 
_refine_ls_number_reflns          3852 
_refine_ls_number_parameters      530 
_refine_ls_number_restraints      0 
_refine_ls_R_factor_all           0.1115 
_refine_ls_R_factor_obs           0.0583 
_refine_ls_wR_factor_all          0.1779 
_refine_ls_wR_factor_obs          0.1394 
_refine_ls_goodness_of_fit_all    1.019 
_refine_ls_goodness_of_fit_obs    1.166 
_refine_ls_restrained_S_all       1.079 
_refine_ls_restrained_S_obs       1.166 
_refine_ls_shift/esd_max          0.003 
_refine_ls_shift/esd_mean         0.000 
 
loop_ 
 _atom_site_label 
 _atom_site_type_symbol 
 _atom_site_fract_x 
 _atom_site_fract_y 
 _atom_site_fract_z 
 _atom_site_U_iso_or_equiv 
 _atom_site_thermal_displace_type 
 _atom_site_occupancy 
 _atom_site_calc_flag 
 _atom_site_refinement_flags 
 _atom_site_disorder_group 
I1 I 0.33412(6) 0.69525(13) 0.00607(6) 0.0731(5) Uani 1 d . . 
Cl2 Cl 0.2769(2) 0.9872(3) 0.00704(14) 0.1084(9) Uani 0.30 d P . 
Br2 Br 0.2769(2) 0.9872(3) 0.00704(14) 0.1084(9) Uani 0.65 d P . 
I2 I 0.2769(2) 0.9872(3) 0.00704(14) 0.1084(9) Uani 0.05 d P . 
Cl3 Cl 0.39066(13) 0.4040(2) 0.00554(13) 0.0888(8) Uani 0.30 d P . 
Br3 Br 0.39066(13) 0.4040(2) 0.00554(13) 0.0888(8) Uani 0.65 d P . 
I3 I 0.39066(13) 0.4040(2) 0.00554(13) 0.0888(8) Uani 0.05 d P . 
I4 I 0.0000 0.0000 0.0000 0.0681(5) Uani 1 d S . 
Cl5 Cl -0.0565(2) 0.2885(3) 0.00224(15) 0.1105(9) Uani 0.30 d P . 
Br5 Br -0.0565(2) 0.2885(3) 0.00224(15) 0.1105(9) Uani 0.65 d P . 
I5 I -0.0565(2) 0.2885(3) 0.00224(15) 0.1105(9) Uani 0.05 d P . 
S1 S 0.2346(2) 0.2864(5) 0.3741(2) 0.0632(12) Uani 1 d . . 
S2 S 0.0753(2) 0.2098(5) 0.3764(2) 0.0651(12) Uani 1 d . . 
S3 S 0.2469(2) 0.3838(5) 0.1988(2) 0.0727(13) Uani 1 d . . 
S4 S 0.0563(2) 0.2917(5) 0.2029(2) 0.0720(13) Uani 1 d . . 
S5 S 0.2470(2) 0.1325(5) 0.5569(2) 0.0638(12) Uani 1 d . . 
S6 S 0.0889(2) 0.0518(5) 0.5529(2) 0.0670(12) Uani 1 d . . 
S7 S 0.2761(2) -0.0155(5) 0.7156(2) 0.0742(13) Uani 1 d . . 
S8 S 0.0910(3) -0.1194(6) 0.7095(3) 0.088(2) Uani 1 d . . 
S9 S 0.4156(2) 0.3727(5) 0.4764(2) 0.0700(13) Uani 1 d . . 
S10 S 0.5713(2) 0.2096(4) 0.4237(2) 0.0656(12) Uani 1 d . . 
S11 S 0.3916(3) 0.5328(5) 0.3209(3) 0.0827(14) Uani 1 d . . 
S12 S 0.5763(2) 0.3361(5) 0.2544(2) 0.0777(14) Uani 1 d . . 
S13 S 0.4231(2) 0.2119(5) 0.6546(2) 0.0644(12) Uani 1 d . . 
S14 S 0.5811(2) 0.0572(5) 0.6053(2) 0.0664(12) Uani 1 d . . 
S15 S 0.4182(3) 0.1036(5) 0.8266(2) 0.0810(14) Uani 1 d . . 
S16 S 0.6077(3) -0.0763(5) 0.7679(3) 0.0842(15) Uani 1 d . . 
S17 S 0.9037(2) 0.5357(4) 0.3584(2) 0.0613(12) Uani 1 d . . 
S18 S 0.7452(2) 0.4598(4) 0.3590(2) 0.0583(11) Uani 1 d . . 
S19 S 0.9139(2) 0.6517(5) 0.1880(2) 0.0694(13) Uani 1 d . . 
S20 S 0.7229(2) 0.5625(5) 0.1902(2) 0.0696(13) Uani 1 d . . 
S21 S 0.9152(2) 0.3828(5) 0.5414(2) 0.0619(12) Uani 1 d . . 
S22 S 0.7601(2) 0.2927(5) 0.5350(2) 0.0661(12) Uani 1 d . . 
S23 S 0.9374(3) 0.2603(6) 0.7063(3) 0.088(2) Uani 1 d . . 
S24 S 0.7550(3) 0.1442(5) 0.6977(3) 0.087(2) Uani 1 d . . 
C1 C 0.1592(8) 0.2005(15) 0.4269(8) 0.050(4) Uani 1 d . . 
C2 C 0.1881(9) 0.3133(15) 0.2827(8) 0.053(4) Uani 1 d . . 
C3 C 0.1161(9) 0.2799(15) 0.2817(8) 0.053(4) Uani 1 d . . 
C4 C 0.1850(13) 0.3901(28) 0.1233(12) 0.140(10) Uani 1 d . . 
H4A H 0.1882 0.4865 0.0959 0.167 Uiso 1 calc . . 
H4B H 0.2116 0.3158 0.0845 0.167 Uiso 1 calc . . 
C5 C 0.1109(13) 0.3749(32) 0.1249(10) 0.160(12) Uani 1 d . . 
H5A H 0.1064 0.3216 0.0755 0.192 Uiso 1 calc . . 
H5B H 0.0828 0.4753 0.1177 0.192 Uiso 1 calc . . 
C6 C 0.1663(7) 0.1369(14) 0.5008(8) 0.046(4) Uani 1 d . . 
C7 C 0.2117(9) 0.0242(14) 0.6390(8) 0.046(4) Uani 1 d . . 
C8 C 0.1415(9) -0.0128(15) 0.6346(9) 0.059(4) Uani 1 d . . 
C9 C 0.2246(12) -0.1215(19) 0.7895(10) 0.088(6) Uani 1 d . . 
H9A H 0.2427 -0.2268 0.7789 0.106 Uiso 1 calc . . 
H9B H 0.2401 -0.1017 0.8430 0.106 Uiso 1 calc . . 
C10 C 0.1391(12) -0.0986(22) 0.7950(11) 0.109(7) Uani 1 d . . 
H10A H 0.1212 0.0021 0.8146 0.130 Uiso 1 calc . . 
H10B H 0.1211 -0.1671 0.8373 0.130 Uiso 1 calc . . 
C11 C 0.4965(8) 0.2479(15) 0.5009(9) 0.052(4) Uani 1 d . . 
C12 C 0.4517(8) 0.4063(15) 0.3771(8) 0.051(4) Uani 1 d . . 
C13 C 0.5249(8) 0.3307(15) 0.3505(7) 0.043(4) Uani 1 d . . 
C14 C 0.4375(10) 0.5077(21) 0.2194(9) 0.092(6) Uani 1 d . . 
H14A H 0.4168 0.4253 0.1969 0.111 Uiso 1 calc . . 
H14B H 0.4191 0.5970 0.1878 0.111 Uiso 1 calc . . 
C15 C 0.5180(12) 0.4804(22) 0.2029(10) 0.101(6) Uani 1 d . . 
H15A H 0.5376 0.5731 0.2122 0.121 Uiso 1 calc . . 
H15B H 0.5287 0.4614 0.1445 0.121 Uiso 1 calc . . 
C16 C 0.4996(8) 0.1781(15) 0.5791(9) 0.056(4) Uani 1 d . . 
C17 C 0.4715(9) 0.1042(15) 0.7304(8) 0.056(4) Uani 1 d . . 
C18 C 0.5444(8) 0.0350(15) 0.7059(8) 0.048(4) Uani 1 d . . 
C19 C 0.4900(13) -0.0023(37) 0.8858(11) 0.185(13) Uani 1 d . . 
H19A H 0.4878 0.0524 0.9362 0.223 Uiso 1 calc . . 
H19B H 0.4696 -0.0949 0.9014 0.223 Uiso 1 calc . . 
C20 C 0.5628(13) -0.0407(33) 0.8639(11) 0.169(12) Uani 1 d . . 
H20A H 0.5784 -0.1305 0.8962 0.202 Uiso 1 calc . . 
H20B H 0.5888 0.0367 0.8844 0.202 Uiso 1 calc . . 
C21 C 0.8284(7) 0.4503(15) 0.4110(8) 0.044(4) Uani 1 d . . 
C22 C 0.8573(8) 0.5740(15) 0.2684(8) 0.056(4) Uani 1 d . . 
C23 C 0.7837(8) 0.5382(15) 0.2676(8) 0.052(4) Uani 1 d . . 
C24 C 0.8505(12) 0.6679(29) 0.1115(11) 0.138(9) Uani 1 d . . 
H24A H 0.8572 0.7625 0.0836 0.166 Uiso 1 calc . . 
H24B H 0.8735 0.5907 0.0728 0.166 Uiso 1 calc . . 
C25 C 0.7778(13) 0.6640(31) 0.1160(12) 0.174(13) Uani 1 d . . 
H25A H 0.7677 0.6301 0.0630 0.209 Uiso 1 calc . . 
H25B H 0.7528 0.7676 0.1197 0.209 Uiso 1 calc . . 
C26 C 0.8357(8) 0.3833(14) 0.4855(8) 0.048(4) Uani 1 d . . 
C27 C 0.8781(8) 0.2846(14) 0.6262(8) 0.050(4) Uani 1 d . . 
C28 C 0.8082(9) 0.2435(15) 0.6243(8) 0.055(4) Uani 1 d . . 
C29 C 0.8876(13) 0.1581(21) 0.7820(10) 0.094(6) Uani 1 d . . 
H29A H 0.9134 0.0550 0.7793 0.113 Uiso 1 calc . . 
H29B H 0.8963 0.1951 0.8348 0.113 Uiso 1 calc . . 
C30 C 0.8090(14) 0.1554(28) 0.7827(11) 0.137(9) Uani 1 d . . 
H30A H 0.7838 0.2450 0.8111 0.164 Uiso 1 calc . . 
H30B H 0.7983 0.0716 0.8186 0.164 Uiso 1 calc . . 
 
loop_ 
 _atom_site_aniso_label 
 _atom_site_aniso_U_11 
 _atom_site_aniso_U_22 
 _atom_site_aniso_U_33 
 _atom_site_aniso_U_23 
 _atom_site_aniso_U_13 
 _atom_site_aniso_U_12 
I1 0.0798(9) 0.0884(10) 0.0520(8) 0.0068(6) -0.0063(6) -0.0175(7) 
Cl2 0.145(2) 0.092(2) 0.081(2) 0.0109(14) -0.009(2) 0.003(2) 
Br2 0.145(2) 0.092(2) 0.081(2) 0.0109(14) -0.009(2) 0.003(2) 
I2 0.145(2) 0.092(2) 0.081(2) 0.0109(14) -0.009(2) 0.003(2) 
Cl3 0.105(2) 0.091(2) 0.0705(15) 0.0062(12) -0.0077(13) -0.0183(13) 
Br3 0.105(2) 0.091(2) 0.0705(15) 0.0062(12) -0.0077(13) -0.0183(13) 
I3 0.105(2) 0.091(2) 0.0705(15) 0.0062(12) -0.0077(13) -0.0183(13) 
I4 0.0685(11) 0.0760(12) 0.0558(10) 0.0052(8) 0.0020(8) -0.0043(8) 
Cl5 0.132(2) 0.089(2) 0.101(2) 0.0125(15) -0.004(2) 0.007(2) 
Br5 0.132(2) 0.089(2) 0.101(2) 0.0125(15) -0.004(2) 0.007(2) 
I5 0.132(2) 0.089(2) 0.101(2) 0.0125(15) -0.004(2) 0.007(2) 
S1 0.060(3) 0.083(3) 0.049(3) 0.012(2) -0.006(2) -0.020(2) 
S2 0.056(3) 0.098(3) 0.044(3) 0.018(2) -0.007(2) -0.023(2) 
S3 0.058(3) 0.103(4) 0.059(3) 0.034(3) -0.010(2) -0.022(2) 
S4 0.061(3) 0.103(4) 0.055(3) 0.035(2) -0.015(2) -0.024(2) 
S5 0.061(3) 0.086(3) 0.049(3) 0.017(2) -0.011(2) -0.025(2) 
S6 0.056(3) 0.095(3) 0.051(3) 0.027(2) -0.010(2) -0.021(2) 
S7 0.070(3) 0.103(4) 0.053(3) 0.024(3) -0.020(2) -0.017(3) 
S8 0.073(3) 0.126(4) 0.072(3) 0.048(3) -0.012(3) -0.040(3) 
S9 0.068(3) 0.089(3) 0.045(3) 0.019(2) 0.002(2) 0.005(2) 
S10 0.062(3) 0.080(3) 0.050(3) 0.019(2) 0.000(2) -0.003(2) 
S11 0.073(3) 0.108(4) 0.054(3) 0.016(3) -0.002(2) 0.022(3) 
S12 0.070(3) 0.100(4) 0.053(3) 0.027(3) 0.009(2) 0.001(3) 
S13 0.059(3) 0.087(3) 0.040(2) 0.013(2) -0.003(2) 0.006(2) 
S14 0.064(3) 0.078(3) 0.052(3) 0.016(2) -0.006(2) 0.004(2) 
S15 0.072(3) 0.113(4) 0.047(3) 0.017(3) 0.001(2) 0.012(3) 
S16 0.071(3) 0.097(4) 0.076(3) 0.038(3) -0.003(3) 0.007(3) 
S17 0.063(3) 0.079(3) 0.046(2) 0.014(2) -0.013(2) -0.020(2) 
S18 0.055(3) 0.079(3) 0.041(2) 0.013(2) -0.002(2) -0.012(2) 
S19 0.058(3) 0.099(3) 0.053(3) 0.033(2) -0.015(2) -0.020(2) 
S20 0.060(3) 0.093(3) 0.059(3) 0.025(2) -0.020(2) -0.020(2) 
S21 0.051(3) 0.092(3) 0.045(3) 0.017(2) -0.010(2) -0.019(2) 
S22 0.061(3) 0.090(3) 0.050(3) 0.021(2) -0.007(2) -0.023(2) 
S23 0.081(3) 0.135(4) 0.056(3) 0.032(3) -0.023(3) -0.034(3) 
S24 0.080(3) 0.113(4) 0.072(3) 0.047(3) -0.010(3) -0.038(3) 
C1 0.050(10) 0.063(10) 0.039(9) -0.001(8) -0.009(8) -0.009(8) 
C2 0.064(11) 0.063(10) 0.029(9) 0.017(8) -0.019(8) 0.002(8) 
C3 0.064(11) 0.049(10) 0.047(10) 0.002(8) -0.015(9) -0.010(8) 
C4 0.095(18) 0.253(29) 0.085(15) 0.073(16) -0.036(14) -0.071(18) 
C5 0.113(19) 0.348(36) 0.042(12) 0.084(16) -0.039(13) -0.106(22) 
C6 0.044(9) 0.046(9) 0.045(10) -0.001(8) -0.002(8) 0.001(7) 
C7 0.065(11) 0.038(9) 0.031(8) 0.009(7) -0.007(8) 0.000(8) 
C8 0.059(11) 0.056(10) 0.057(10) 0.020(8) 0.021(9) -0.012(8) 
C9 0.126(17) 0.093(14) 0.055(11) 0.027(10) -0.045(12) -0.030(12) 
C10 0.092(16) 0.155(20) 0.068(13) 0.035(12) 0.033(12) -0.019(13) 
C11 0.047(10) 0.058(10) 0.051(10) 0.005(8) -0.017(8) 0.004(7) 
C12 0.055(11) 0.056(10) 0.039(9) 0.014(8) -0.006(8) -0.005(8) 
C13 0.052(10) 0.066(10) 0.015(7) 0.011(7) -0.011(7) -0.024(8) 
C14 0.058(13) 0.156(18) 0.058(12) 0.045(11) 0.009(10) -0.021(12) 
C15 0.104(17) 0.137(18) 0.051(12) 0.028(11) -0.008(11) 0.005(13) 
C16 0.054(10) 0.065(11) 0.052(10) -0.002(9) -0.002(8) -0.023(8) 
C17 0.077(12) 0.047(9) 0.047(10) 0.007(8) -0.012(9) -0.010(8) 
C18 0.051(10) 0.055(10) 0.036(9) -0.004(7) 0.000(8) 0.000(8) 
C19 0.094(19) 0.408(42) 0.034(12) 0.082(18) -0.027(12) 0.024(22) 
C20 0.093(18) 0.332(35) 0.047(13) -0.011(17) -0.013(12) 0.082(21) 
C21 0.047(9) 0.058(10) 0.027(9) 0.001(8) -0.002(7) -0.005(7) 
C22 0.051(11) 0.068(11) 0.041(9) 0.017(8) -0.004(8) 0.008(8) 
C23 0.044(10) 0.058(10) 0.050(10) 0.012(8) -0.010(8) 0.009(8) 
C24 0.089(16) 0.278(29) 0.060(13) 0.060(15) 0.003(13) -0.085(18) 
C25 0.110(19) 0.373(37) 0.073(14) 0.132(18) -0.033(14) -0.159(23) 
C26 0.073(11) 0.050(9) 0.024(9) 0.008(7) -0.001(8) -0.027(8) 
C27 0.053(10) 0.045(9) 0.056(10) -0.002(8) -0.012(8) -0.015(8) 
C28 0.059(11) 0.058(10) 0.041(9) 0.016(8) -0.008(8) 0.006(8) 
C29 0.122(17) 0.109(15) 0.055(12) 0.042(11) -0.028(13) -0.028(13) 
C30 0.140(22) 0.230(28) 0.045(12) 0.052(14) -0.001(15) -0.059(20) 
 
_geom_special_details 
; 
 All esds (except the esd in the dihedral angle between two l.s. planes) 
 are estimated using the full covariance matrix.  The cell esds are taken 
 into account individually in the estimation of esds in distances, angles 
 and torsion angles; correlations between esds in cell parameters are only 
 used when they are defined by crystal symmetry.  An approximate (isotropic) 
 treatment of cell esds is used for estimating esds involving l.s. planes. 
; 
 
loop_ 
 _geom_bond_atom_site_label_1 
 _geom_bond_atom_site_label_2 
 _geom_bond_distance 
 _geom_bond_site_symmetry_2 
 _geom_bond_publ_flag 
I1 I3 2.662(3) . ? 
I1 Br3 2.662(3) . ? 
I1 Cl3 2.662(3) . ? 
I1 Cl2 2.670(3) . ? 
I1 I2 2.670(3) . ? 
I1 Br2 2.670(3) . ? 
I4 I5 2.639(2) . ? 
I4 Cl5 2.639(2) . ? 
I4 Br5 2.639(2) . ? 
I4 I5 2.639(2) 2 ? 
I4 Cl5 2.639(2) 2 ? 
I4 Br5 2.639(2) 2 ? 
S1 C1 1.750(13) . ? 
S1 C2 1.759(13) . ? 
S2 C1 1.727(14) . ? 
S2 C3 1.772(14) . ? 
S3 C4 1.71(2) . ? 
S3 C2 1.780(14) . ? 
S4 C3 1.720(15) . ? 
S4 C5 1.73(2) . ? 
S5 C6 1.736(14) . ? 
S5 C7 1.747(13) . ? 
S6 C8 1.73(2) . ? 
S6 C6 1.770(13) . ? 
S7 C7 1.748(14) . ? 
S7 C9 1.77(2) . ? 
S8 C10 1.73(2) . ? 
S8 C8 1.772(13) . ? 
S9 C12 1.713(13) . ? 
S9 C11 1.728(14) . ? 
S10 C11 1.717(14) . ? 
S10 C13 1.762(13) . ? 
S11 C12 1.727(14) . ? 
S11 C14 1.77(2) . ? 
S12 C13 1.727(12) . ? 
S12 C15 1.77(2) . ? 
S13 C16 1.715(13) . ? 
S13 C17 1.747(14) . ? 
S14 C18 1.719(13) . ? 
S14 C16 1.73(2) . ? 
S15 C17 1.741(14) . ? 
S15 C19 1.79(2) . ? 
S16 C20 1.70(2) . ? 
S16 C18 1.746(14) . ? 
S17 C22 1.744(14) . ? 
S17 C21 1.746(13) . ? 
S18 C21 1.729(13) . ? 
S18 C23 1.744(14) . ? 
S19 C24 1.73(2) . ? 
S19 C22 1.750(13) . ? 
S20 C23 1.709(14) . ? 
S20 C25 1.78(2) . ? 
S21 C26 1.722(14) . ? 
S21 C27 1.738(13) . ? 
S22 C26 1.757(12) . ? 
S22 C28 1.761(14) . ? 
S23 C27 1.731(14) . ? 
S23 C29 1.75(2) . ? 
S24 C28 1.743(14) . ? 
S24 C30 1.76(2) . ? 
C1 C6 1.33(2) . ? 
C2 C3 1.32(2) . ? 
C4 C5 1.30(2) . ? 
C7 C8 1.31(2) . ? 
C9 C10 1.45(2) . ? 
C11 C16 1.41(2) . ? 
C12 C13 1.38(2) . ? 
C14 C15 1.37(2) . ? 
C17 C18 1.35(2) . ? 
C19 C20 1.27(2) . ? 
C21 C26 1.35(2) . ? 
C22 C23 1.36(2) . ? 
C24 C25 1.26(2) . ? 
C27 C28 1.32(2) . ? 
C29 C30 1.36(2) . ? 
 
loop_ 
 _geom_angle_atom_site_label_1 
 _geom_angle_atom_site_label_2 
 _geom_angle_atom_site_label_3 
 _geom_angle 
 _geom_angle_site_symmetry_1 
 _geom_angle_site_symmetry_3 
 _geom_angle_publ_flag 
I3 I1 Br3 0.00(13) . . ? 
I3 I1 Cl3 0.00(13) . . ? 
Br3 I1 Cl3 0.00(13) . . ? 
I3 I1 Cl2 179.76(8) . . ? 
Br3 I1 Cl2 179.76(8) . . ? 
Cl3 I1 Cl2 179.76(8) . . ? 
I3 I1 I2 179.76(8) . . ? 
Br3 I1 I2 179.76(8) . . ? 
Cl3 I1 I2 179.76(8) . . ? 
Cl2 I1 I2 0.0(2) . . ? 
I3 I1 Br2 179.76(8) . . ? 
Br3 I1 Br2 179.76(8) . . ? 
Cl3 I1 Br2 179.76(8) . . ? 
Cl2 I1 Br2 0.0(2) . . ? 
I2 I1 Br2 0.0(2) . . ? 
I5 I4 Cl5 0.0(2) . . ? 
I5 I4 Br5 0.0(2) . . ? 
Cl5 I4 Br5 0.0(2) . . ? 
I5 I4 I5 180.0 . 2 ? 
Cl5 I4 I5 180.0 . 2 ? 
Br5 I4 I5 180.0 . 2 ? 
I5 I4 Cl5 180.0 . 2 ? 
Cl5 I4 Cl5 180.0 . 2 ? 
Br5 I4 Cl5 180.0 . 2 ? 
I5 I4 Cl5 0.0(2) 2 2 ? 
I5 I4 Br5 180.0 . 2 ? 
Cl5 I4 Br5 180.0 . 2 ? 
Br5 I4 Br5 180.0 . 2 ? 
I5 I4 Br5 0.0(2) 2 2 ? 
Cl5 I4 Br5 0.0(2) 2 2 ? 
C1 S1 C2 94.1(7) . . ? 
C1 S2 C3 96.2(7) . . ? 
C4 S3 C2 100.3(8) . . ? 
C3 S4 C5 102.1(8) . . ? 
C6 S5 C7 96.0(7) . . ? 
C8 S6 C6 94.3(7) . . ? 
C7 S7 C9 103.6(7) . . ? 
C10 S8 C8 101.4(8) . . ? 
C12 S9 C11 95.7(7) . . ? 
C11 S10 C13 95.1(7) . . ? 
C12 S11 C14 102.4(8) . . ? 
C13 S12 C15 102.7(8) . . ? 
C16 S13 C17 95.3(7) . . ? 
C18 S14 C16 94.5(7) . . ? 
C17 S15 C19 100.6(8) . . ? 
C20 S16 C18 102.5(9) . . ? 
C22 S17 C21 95.5(7) . . ? 
C21 S18 C23 97.0(7) . . ? 
C24 S19 C22 100.9(8) . . ? 
C23 S20 C25 101.2(8) . . ? 
C26 S21 C27 96.0(6) . . ? 
C26 S22 C28 95.0(7) . . ? 
C27 S23 C29 105.1(8) . . ? 
C28 S24 C30 99.9(8) . . ? 
C6 C1 S2 123.3(11) . . ? 
C6 C1 S1 122.0(11) . . ? 
S2 C1 S1 114.7(8) . . ? 
C3 C2 S1 119.3(10) . . ? 
C3 C2 S3 126.8(11) . . ? 
S1 C2 S3 113.9(8) . . ? 
C2 C3 S4 130.3(11) . . ? 
C2 C3 S2 114.8(11) . . ? 
S4 C3 S2 114.9(8) . . ? 
C5 C4 S3 132.3(16) . . ? 
C4 C5 S4 126.3(16) . . ? 
C1 C6 S5 125.4(11) . . ? 
C1 C6 S6 120.9(11) . . ? 
S5 C6 S6 113.6(8) . . ? 
C8 C7 S5 115.9(11) . . ? 
C8 C7 S7 130.2(11) . . ? 
S5 C7 S7 113.9(8) . . ? 
C7 C8 S6 119.8(10) . . ? 
C7 C8 S8 125.5(12) . . ? 
S6 C8 S8 114.6(9) . . ? 
C10 C9 S7 118.5(13) . . ? 
C9 C10 S8 120.3(12) . . ? 
C16 C11 S10 122.0(11) . . ? 
C16 C11 S9 121.6(11) . . ? 
S10 C11 S9 116.3(9) . . ? 
C13 C12 S9 117.4(10) . . ? 
C13 C12 S11 126.9(10) . . ? 
S9 C12 S11 115.8(8) . . ? 
C12 C13 S12 128.7(10) . . ? 
C12 C13 S10 115.5(9) . . ? 
S12 C13 S10 115.7(8) . . ? 
C15 C14 S11 122.0(14) . . ? 
C14 C15 S12 121.7(14) . . ? 
C11 C16 S13 121.7(12) . . ? 
C11 C16 S14 122.1(10) . . ? 
S13 C16 S14 116.2(9) . . ? 
C18 C17 S15 129.7(11) . . ? 
C18 C17 S13 115.3(10) . . ? 
S15 C17 S13 115.0(9) . . ? 
C17 C18 S14 118.6(11) . . ? 
C17 C18 S16 125.9(10) . . ? 
S14 C18 S16 115.5(8) . . ? 
C20 C19 S15 127.1(17) . . ? 
C19 C20 S16 128.5(18) . . ? 
C26 C21 S18 123.8(10) . . ? 
C26 C21 S17 122.2(11) . . ? 
S18 C21 S17 114.0(8) . . ? 
C23 C22 S17 117.8(10) . . ? 
C23 C22 S19 127.6(11) . . ? 
S17 C22 S19 114.6(8) . . ? 
C22 C23 S20 129.0(11) . . ? 
C22 C23 S18 115.3(11) . . ? 
S20 C23 S18 115.7(8) . . ? 
C25 C24 S19 130.2(15) . . ? 
C24 C25 S20 126.4(18) . . ? 
C21 C26 S21 124.7(10) . . ? 
C21 C26 S22 121.0(11) . . ? 
S21 C26 S22 114.3(7) . . ? 
C28 C27 S23 127.5(11) . . ? 
C28 C27 S21 117.9(11) . . ? 
S23 C27 S21 114.5(8) . . ? 
C27 C28 S24 129.4(12) . . ? 
C27 C28 S22 116.8(11) . . ? 
S24 C28 S22 113.8(9) . . ? 
C30 C29 S23 121.0(14) . . ? 
C29 C30 S24 127.6(15) . . ? 
 
_refine_diff_density_max    0.512 
_refine_diff_density_min   -0.908 
_refine_diff_density_rms    0.108 


"#===END"


data_b2 
 
_audit_creation_method            SHELXL 
_chemical_name_systematic 
; 
 ? 
; 
_chemical_name_common             ? 
_chemical_formula_moiety          ? 
_chemical_formula_structural      ? 
_chemical_formula_analytical      ? 
_chemical_formula_sum             'C20 H16 Br1.30 Cl0.60 I1.10 S16' 
_chemical_formula_weight          1034.03 
_chemical_melting_point           ? 
_chemical_compound_source         ? 
 
loop_ 
 _atom_type_symbol 
 _atom_type_description 
 _atom_type_scat_dispersion_real 
 _atom_type_scat_dispersion_imag 
 _atom_type_scat_source 
 'C'  'C'   0.0033   0.0016 
 'International Tables Vol C Tables 4.2.6.8 and 6.1.1.4' 
 'H'  'H'   0.0000   0.0000 
 'International Tables Vol C Tables 4.2.6.8 and 6.1.1.4' 
 'S'  'S'   0.1246   0.1234 
 'International Tables Vol C Tables 4.2.6.8 and 6.1.1.4' 
 'Cl'  'Cl'   0.1484   0.1585 
 'International Tables Vol C Tables 4.2.6.8 and 6.1.1.4' 
 'Br'  'Br'  -0.2901   2.4595 
 'International Tables Vol C Tables 4.2.6.8 and 6.1.1.4' 
 'I'  'I'  -0.4742   1.8119 
 'International Tables Vol C Tables 4.2.6.8 and 6.1.1.4' 
 
_symmetry_cell_setting            triclinic 
_symmetry_space_group_name_H-M    P-1 
 
loop_ 
 _symmetry_equiv_pos_as_xyz 
 'x, y, z' 
 '-x, -y, -z' 
 
_cell_length_a                    5.918(1) 
_cell_length_b                    9.136(2) 
_cell_length_c                    16.282(3) 
_cell_angle_alpha                 92.07(1) 
_cell_angle_beta                  96.48(1) 
_cell_angle_gamma                 105.30(1) 
_cell_volume                      841.7(3) 
_cell_formula_units_Z             1 
_cell_measurement_temperature     396(2) 
_cell_measurement_reflns_used     3795 
_cell_measurement_theta_min       1.0 
_cell_measurement_theta_max       20.0 
 
_exptl_crystal_description        plate 
_exptl_crystal_colour             black 
_exptl_crystal_size_max           0.3 
_exptl_crystal_size_mid           0.2 
_exptl_crystal_size_min           0.02 
_exptl_crystal_density_meas       ? 
_exptl_crystal_density_diffrn     2.040 
_exptl_crystal_density_method     ? 
_exptl_crystal_F_000              506 
_exptl_absorpt_coefficient_mu     3.643 
_exptl_absorpt_correction_type    none 
_exptl_absorpt_correction_T_min   ? 
_exptl_absorpt_correction_T_max   ? 
 
_exptl_special_details 
; 
 ? 
; 
 
_diffrn_ambient_temperature       398(2) 
_diffrn_radiation_wavelength      0.71073 
_diffrn_radiation_type            MoK\a 
_diffrn_radiation_source          'fine-focus sealed tube' 
_diffrn_radiation_monochromator   graphite 
_diffrn_measurement_device        'Kappa CCD' 
_diffrn_measurement_method        phi-scan 
_diffrn_standards_number          ? 
_diffrn_standards_interval_count  ? 
_diffrn_standards_interval_time   ? 
_diffrn_standards_decay_%         0 
_diffrn_reflns_number             2618 
_diffrn_reflns_av_R_equivalents   0.0369 
_diffrn_reflns_av_sigmaI/netI     0.0556 
_diffrn_reflns_limit_h_min        0 
_diffrn_reflns_limit_h_max        5 
_diffrn_reflns_limit_k_min        -8 
_diffrn_reflns_limit_k_max        8 
_diffrn_reflns_limit_l_min        -15 
_diffrn_reflns_limit_l_max        15 
_diffrn_reflns_theta_min          1.26 
_diffrn_reflns_theta_max          19.99 
_reflns_number_total              1494 
_reflns_number_observed           1195 
_reflns_observed_criterion        >2sigma(I) 
 
_computing_data_collection        'Kappa CCD' 
_computing_cell_refinement        ? 
_computing_data_reduction         'Denzo and Scalepack' 
_computing_structure_solution     'SHELXS-86 (Sheldrick, 1990)' 
_computing_structure_refinement   'SHELXL-93 (Sheldrick, 1993)' 
_computing_molecular_graphics     ? 
_computing_publication_material   ? 
 
_refine_special_details 
; 
 occupation disorder Cl : Br : I of 0.3 : 0.65 : 0.05 of the 
 centrosymmetric anion with Cl2=Br2=I2 
; 
 
_refine_ls_structure_factor_coef  Fsqd  
_refine_ls_matrix_type            full 
_refine_ls_weighting_scheme 
 'calc w=1/[\s^2^(Fo^2^)+(0.0734P)^2^+0.8411P] where P=(Fo^2^+2Fc^2^)/3' 
_atom_sites_solution_primary      direct 
_atom_sites_solution_secondary    difmap 
_atom_sites_solution_hydrogens    geom 
_refine_ls_hydrogen_treatment     riding 
_refine_ls_extinction_method      none 
_refine_ls_extinction_coef        ? 
_refine_ls_number_reflns          1435 
_refine_ls_number_parameters      178 
_refine_ls_number_restraints      0 
_refine_ls_R_factor_all           0.0614 
_refine_ls_R_factor_obs           0.0468 
_refine_ls_wR_factor_all          0.1309 
_refine_ls_wR_factor_obs          0.1215 
_refine_ls_goodness_of_fit_all    1.057 
_refine_ls_goodness_of_fit_obs    1.115 
_refine_ls_restrained_S_all       1.058 
_refine_ls_restrained_S_obs       1.115 
_refine_ls_shift/esd_max          0.000 
_refine_ls_shift/esd_mean         0.000 
 
loop_ 
 _atom_site_label 
 _atom_site_type_symbol 
 _atom_site_fract_x 
 _atom_site_fract_y 
 _atom_site_fract_z 
 _atom_site_U_iso_or_equiv 
 _atom_site_thermal_displace_type 
 _atom_site_occupancy 
 _atom_site_calc_flag 
 _atom_site_refinement_flags 
 _atom_site_disorder_group 
I1 I 0.0000 0.0000 1.0000 0.0734(5) Uani 1 d S . 
Cl2 Cl -0.1698(3) 0.2412(2) 0.99455(10) 0.1083(6) Uani 0.30 d P . 
Br2 Br -0.1698(3) 0.2412(2) 0.99455(10) 0.1083(6) Uani 0.65 d P . 
I2 I -0.1698(3) 0.2412(2) 0.99455(10) 0.1083(6) Uani 0.05 d P . 
S1 S 0.7067(5) 0.4644(3) 0.63708(15) 0.0695(9) Uani 1 d . . 
S2 S 0.2267(4) 0.2656(3) 0.62741(15) 0.0686(8) Uani 1 d . . 
S3 S 0.7310(5) 0.5817(4) 0.8097(2) 0.0801(10) Uani 1 d . . 
S4 S 0.1593(5) 0.3405(4) 0.7986(2) 0.0823(10) Uani 1 d . . 
S5 S 0.7484(5) 0.3222(3) 0.4545(2) 0.0705(9) Uani 1 d . . 
S6 S 0.2759(5) 0.1156(3) 0.4522(2) 0.0772(9) Uani 1 d . . 
S7 S 0.8316(5) 0.2059(4) 0.2942(2) 0.0916(11) Uani 1 d . . 
S8 S 0.2796(6) -0.0464(4) 0.2932(2) 0.1073(13) Uani 1 d . . 
C1 C 0.4832(16) 0.3239(10) 0.5815(5) 0.054(3) Uani 1 d . . 
C2 C 0.5641(17) 0.4621(10) 0.7261(5) 0.051(2) Uani 1 d . . 
C3 C 0.3470(16) 0.3715(11) 0.7208(5) 0.053(2) Uani 1 d . . 
C4 C 0.5334(27) 0.5512(19) 0.8828(8) 0.140(7) Uani 1 d . . 
H4A H 0.6205 0.5256 0.9318 0.168 Uiso 1 calc . . 
H4B H 0.5129 0.6508 0.8964 0.168 Uiso 1 calc . . 
C5 C 0.3263(29) 0.4602(21) 0.8786(9) 0.179(10) Uani 1 d . . 
H5A H 0.2275 0.5236 0.8940 0.215 Uiso 1 calc . . 
H5B H 0.3361 0.3954 0.9241 0.215 Uiso 1 calc . . 
C6 C 0.5003(15) 0.2599(10) 0.5060(5) 0.053(2) Uani 1 d . . 
C7 C 0.6419(17) 0.1910(10) 0.3684(5) 0.052(2) Uani 1 d . . 
C8 C 0.4265(17) 0.0964(11) 0.3682(6) 0.060(3) Uani 1 d . . 
C9 C 0.6754(27) 0.0638(14) 0.2164(7) 0.104(5) Uani 1 d . . 
H9A H 0.7067 0.1048 0.1635 0.125 Uiso 1 calc . . 
H9B H 0.7461 -0.0205 0.2214 0.125 Uiso 1 calc . . 
C10 C 0.4370(30) 0.0041(19) 0.2119(9) 0.143(7) Uani 1 d . . 
H10A H 0.3993 -0.0865 0.1745 0.171 Uiso 1 calc . . 
H10B H 0.3674 0.0762 0.1834 0.171 Uiso 1 calc . . 
 
loop_ 
 _atom_site_aniso_label 
 _atom_site_aniso_U_11 
 _atom_site_aniso_U_22 
 _atom_site_aniso_U_33 
 _atom_site_aniso_U_23 
 _atom_site_aniso_U_13 
 _atom_site_aniso_U_12 
I1 0.0743(8) 0.0907(8) 0.0550(7) -0.0079(5) 0.0071(5) 0.0240(6) 
Cl2 0.1311(15) 0.1126(13) 0.0950(12) -0.0067(10) 0.0155(10) 0.0584(11) 
Br2 0.1311(15) 0.1126(13) 0.0950(12) -0.0067(10) 0.0155(10) 0.0584(11) 
I2 0.1311(15) 0.1126(13) 0.0950(12) -0.0067(10) 0.0155(10) 0.0584(11) 
S1 0.067(2) 0.080(2) 0.049(2) -0.0165(15) 0.0155(14) -0.002(2) 
S2 0.058(2) 0.089(2) 0.048(2) -0.0162(15) 0.0101(13) 0.0032(15) 
S3 0.069(2) 0.099(2) 0.060(2) -0.031(2) 0.0191(15) 0.002(2) 
S4 0.068(2) 0.106(2) 0.061(2) -0.030(2) 0.0261(15) 0.002(2) 
S5 0.065(2) 0.080(2) 0.052(2) -0.0175(14) 0.0174(14) -0.0058(15) 
S6 0.067(2) 0.093(2) 0.056(2) -0.024(2) 0.0154(14) -0.005(2) 
S7 0.074(2) 0.121(3) 0.065(2) -0.029(2) 0.026(2) -0.003(2) 
S8 0.083(2) 0.119(3) 0.090(2) -0.057(2) 0.021(2) -0.021(2) 
C1 0.061(6) 0.061(6) 0.036(6) 0.001(5) 0.009(5) 0.009(5) 
C2 0.064(7) 0.053(6) 0.037(5) -0.017(5) 0.005(5) 0.022(5) 
C3 0.041(6) 0.059(6) 0.052(6) -0.013(5) -0.002(5) 0.007(5) 
C4 0.116(12) 0.187(15) 0.070(9) -0.057(10) 0.035(9) -0.042(11) 
C5 0.126(13) 0.251(20) 0.079(10) -0.099(12) 0.053(10) -0.092(14) 
C6 0.056(6) 0.057(6) 0.040(6) 0.000(5) 0.005(5) 0.007(5) 
C7 0.058(6) 0.064(6) 0.029(5) -0.009(5) 0.013(5) 0.006(5) 
C8 0.052(6) 0.073(7) 0.047(6) -0.021(5) 0.003(5) 0.005(6) 
C9 0.131(12) 0.097(10) 0.068(8) -0.022(7) 0.049(8) -0.011(9) 
C10 0.124(14) 0.173(16) 0.097(11) -0.061(11) 0.028(10) -0.016(12) 
 
_geom_special_details 
; 
 All esds (except the esd in the dihedral angle between two l.s. planes) 
 are estimated using the full covariance matrix.  The cell esds are taken 
 into account individually in the estimation of esds in distances, angles 
 and torsion angles; correlations between esds in cell parameters are only 
 used when they are defined by crystal symmetry.  An approximate (isotropic) 
 treatment of cell esds is used for estimating esds involving l.s. planes. 
; 
 
loop_ 
 _geom_bond_atom_site_label_1 
 _geom_bond_atom_site_label_2 
 _geom_bond_distance 
 _geom_bond_site_symmetry_2 
 _geom_bond_publ_flag 
I1 I2 2.652(2) 2_557 ? 
I1 Br2 2.652(2) 2_557 ? 
I1 Cl2 2.652(2) 2_557 ? 
I1 Cl2 2.652(2) . ? 
I1 I2 2.652(2) . ? 
I1 Br2 2.652(2) . ? 
S1 C1 1.722(9) . ? 
S1 C2 1.755(9) . ? 
S2 C1 1.733(9) . ? 
S2 C3 1.744(9) . ? 
S3 C4 1.740(13) . ? 
S3 C2 1.745(9) . ? 
S4 C5 1.704(13) . ? 
S4 C3 1.760(10) . ? 
S5 C6 1.748(9) . ? 
S5 C7 1.754(8) . ? 
S6 C6 1.731(9) . ? 
S6 C8 1.742(9) . ? 
S7 C7 1.725(9) . ? 
S7 C9 1.769(12) . ? 
S8 C10 1.71(2) . ? 
S8 C8 1.731(9) . ? 
C1 C6 1.369(12) . ? 
C2 C3 1.324(12) . ? 
C4 C5 1.28(2) . ? 
C7 C8 1.338(12) . ? 
C9 C10 1.36(2) . ? 
 
loop_ 
 _geom_angle_atom_site_label_1 
 _geom_angle_atom_site_label_2 
 _geom_angle_atom_site_label_3 
 _geom_angle 
 _geom_angle_site_symmetry_1 
 _geom_angle_site_symmetry_3 
 _geom_angle_publ_flag 
I2 I1 Br2 0.00(11) 2_557 2_557 ? 
I2 I1 Cl2 0.00(11) 2_557 2_557 ? 
Br2 I1 Cl2 0.00(11) 2_557 2_557 ? 
I2 I1 Cl2 180.000(1) 2_557 . ? 
Br2 I1 Cl2 180.000(1) 2_557 . ? 
Cl2 I1 Cl2 180.000(1) 2_557 . ? 
I2 I1 I2 180.000(1) 2_557 . ? 
Br2 I1 I2 180.000(1) 2_557 . ? 
Cl2 I1 I2 180.000(1) 2_557 . ? 
Cl2 I1 I2 0.00(11) . . ? 
I2 I1 Br2 180.000(1) 2_557 . ? 
Br2 I1 Br2 180.000(1) 2_557 . ? 
Cl2 I1 Br2 180.000(1) 2_557 . ? 
Cl2 I1 Br2 0.00(11) . . ? 
I2 I1 Br2 0.00(11) . . ? 
C1 S1 C2 95.0(4) . . ? 
C1 S2 C3 94.4(4) . . ? 
C4 S3 C2 101.1(6) . . ? 
C5 S4 C3 102.0(6) . . ? 
C6 S5 C7 95.5(4) . . ? 
C6 S6 C8 95.8(4) . . ? 
C7 S7 C9 103.6(5) . . ? 
C10 S8 C8 101.5(6) . . ? 
C6 C1 S1 123.8(7) . . ? 
C6 C1 S2 120.6(7) . . ? 
S1 C1 S2 115.6(5) . . ? 
C3 C2 S3 129.0(7) . . ? 
C3 C2 S1 116.4(6) . . ? 
S3 C2 S1 114.7(6) . . ? 
C2 C3 S2 118.0(7) . . ? 
C2 C3 S4 127.7(7) . . ? 
S2 C3 S4 114.2(5) . . ? 
C5 C4 S3 129.9(10) . . ? 
C4 C5 S4 130.2(10) . . ? 
C1 C6 S6 123.1(7) . . ? 
C1 C6 S5 122.4(7) . . ? 
S6 C6 S5 114.6(5) . . ? 
C8 C7 S7 129.0(7) . . ? 
C8 C7 S5 116.6(7) . . ? 
S7 C7 S5 114.3(5) . . ? 
C7 C8 S8 126.8(7) . . ? 
C7 C8 S6 117.5(7) . . ? 
S8 C8 S6 115.7(6) . . ? 
C10 C9 S7 121.2(10) . . ? 
C9 C10 S8 126.5(11) . . ? 
 
_refine_diff_density_max    0.505 
_refine_diff_density_min   -0.825 
_refine_diff_density_rms    0.095 


"#===END"
